# Supplementary material for: Microwave-assisted Maillard reactions for the preparation of advanced glycation end products (AGEs)
Source: Royal Society of Chemistry journal article supplement (doi:10.1039/c000789g), 2010-01-01

### Pentosidine $^1\text{H}$ NMR, $\text{D}_2\text{O}$

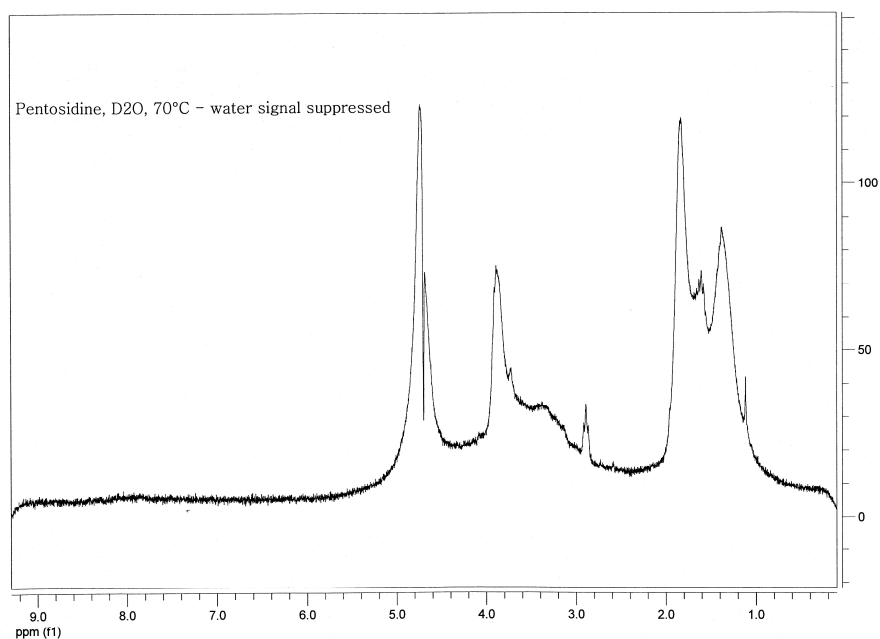

### Pentosidine $^1\text{H}$ NMR, $\text{D}_2\text{O}$ water signal suppressed

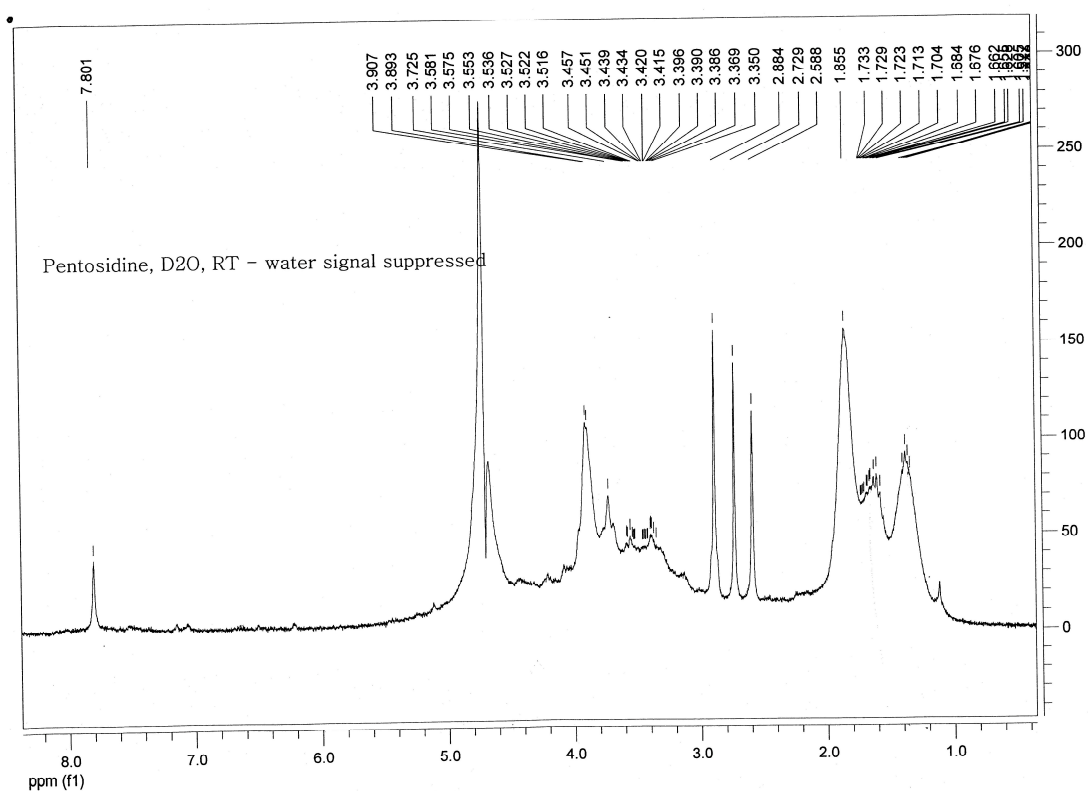

## GOLD HPLC-MS

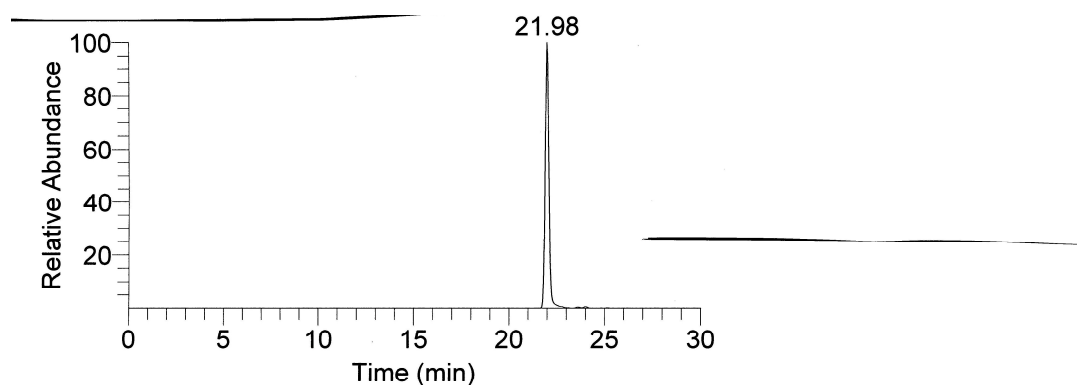

SV\_87\_17lug09\_B#1434 RT: 21.98 AV: 1 NL: 3.23E7  
F: FTMS + p ESI Full ms4 527.00@cid35.00 427.00@cid35.00 327.00@cid35.00 [90.00- ...

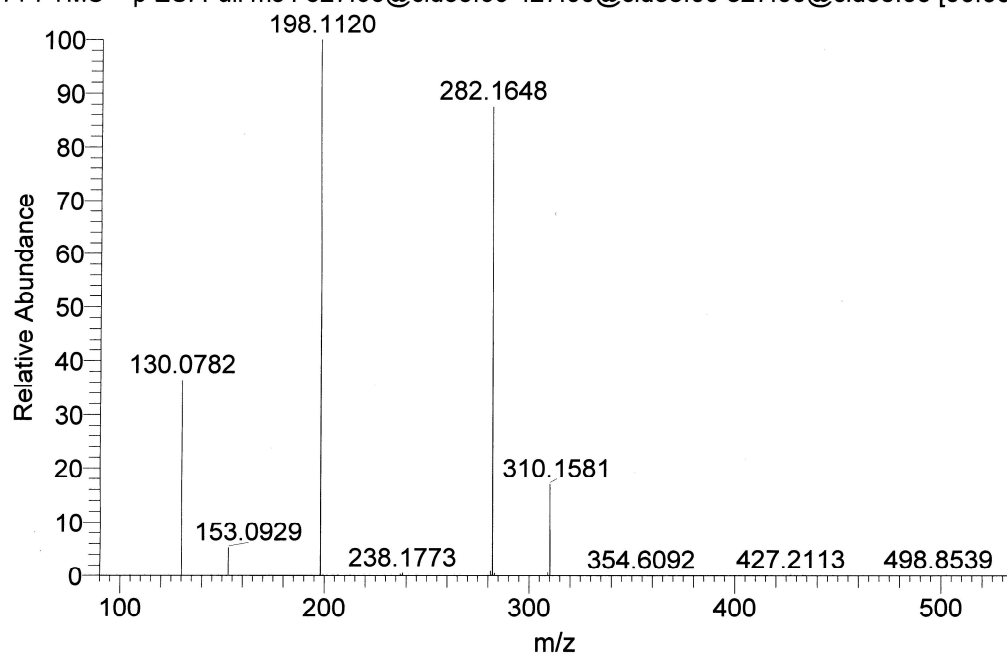

## MOLD HPLC-MS

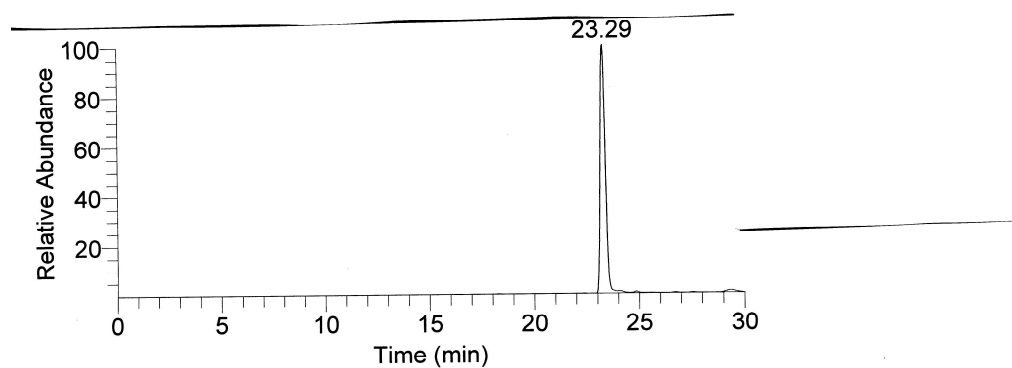

SV\_80\_B\_03lug09 #1634 RT: 23.33 AV: 1 NL: 1.38E8  
F: FTMS + p ESI Full ms2 541.00@cid35.00 [145.00-550.00]

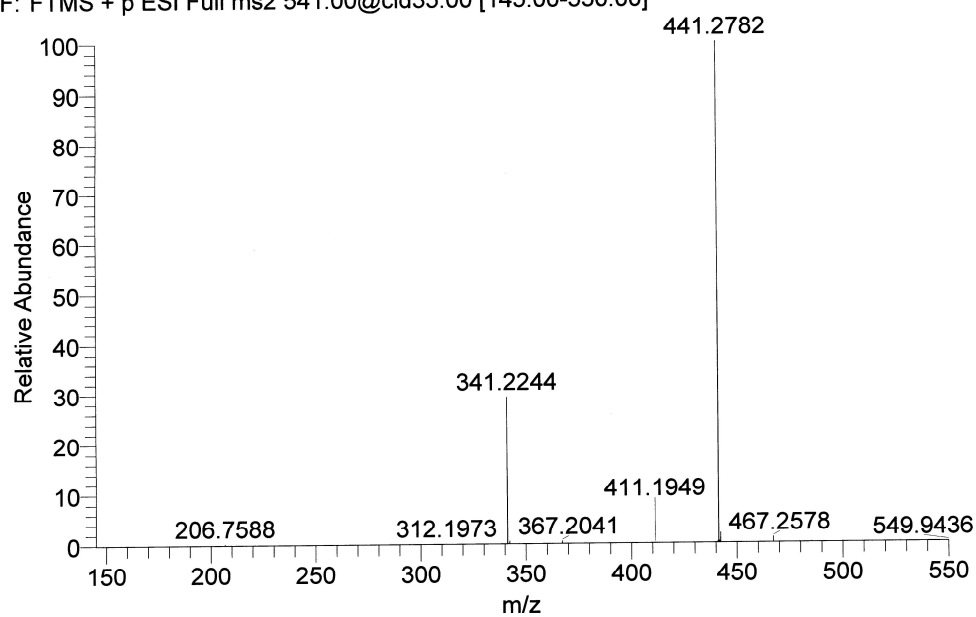

### Pentosidine HPLC-MS

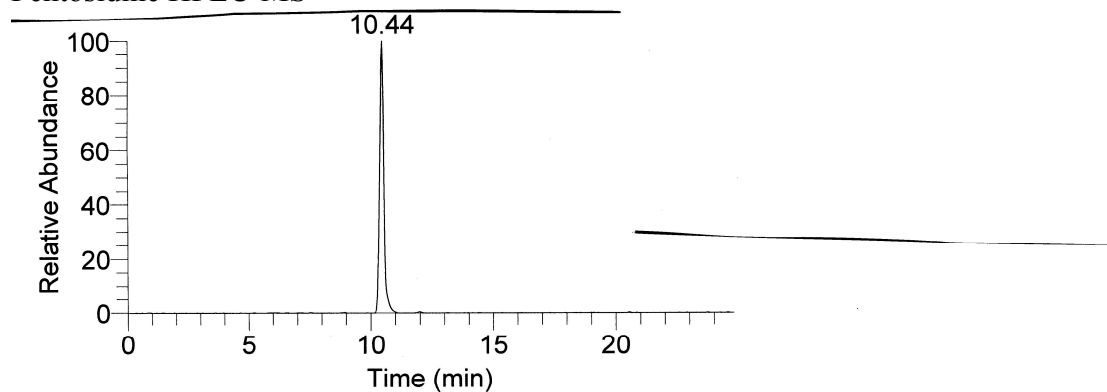

PENTO\_NOBOC\_100ppb\_18mag09 #729 RT: 10.61 AV: 1 NL: 2.53E4  
F: FTMS + p ESI Full ms2 379.00@cid35.00 [100.00-400.00]

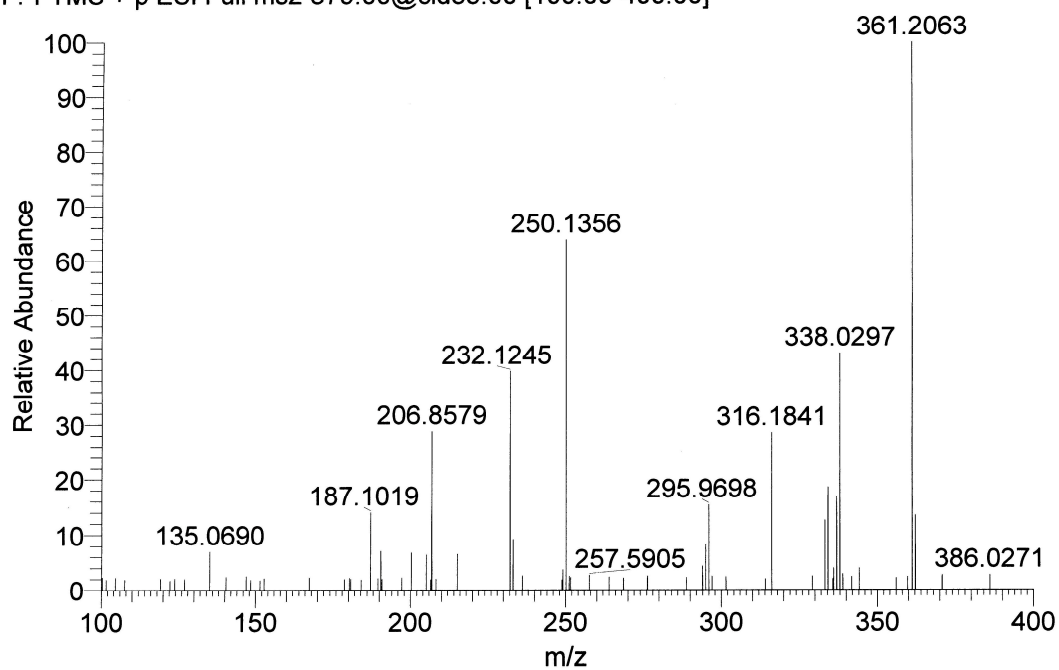

Supplement: c000789g.pdf [file c000789g.pdf]
